# Supplementary material
Source: PubMed Central journal article supplement (PMC3425202)
Supplement: supp_pp.112.199786_199786Figure_S1.pdf [file supp_pp.112.199786_199786Figure_S1.pdf]

## Supplemental data

Figure S1.

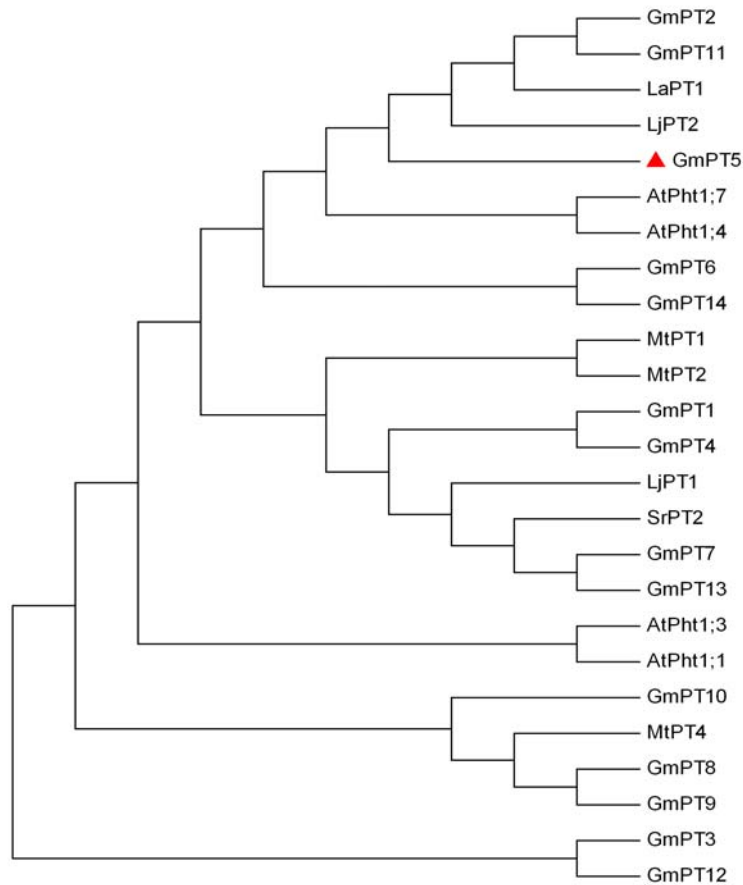

**Figure S1.** Phylogenetic tree analysis among soybean Pht1 family members and phosphate transporters in other plant species. Abbreviations for plant species: At, *Arabidopsis thaliana*; La, *Lupinus albus*; Lj, *Lotus japonicus*; Mt, *Medicago truncatula*; St, *Sesbania rostrata*; Gm, *Glycine max*. Accession number in GenBank: LaPT1, AAK38196; LjPT1, BAE93351; LjPT2, BAE93352; MtPT1, AAB81346; MtPT2, AAB81347; MtPT4, AAM76743; SrPT2, CAC28219. Accession number in TAIR: AtPht1;1, AT5G433450; AtPht1;3, AT5G43360; AtPht1;4, AT2G38940; AtPht1;7, AT3G54700.
