# Supplementary material
Source: PubMed Central journal article supplement (PMC3425202)
Supplement: supp_pp.112.199786_199786Figure_S2.pdf [file supp_pp.112.199786_199786Figure_S2.pdf]

**Figure S2.**

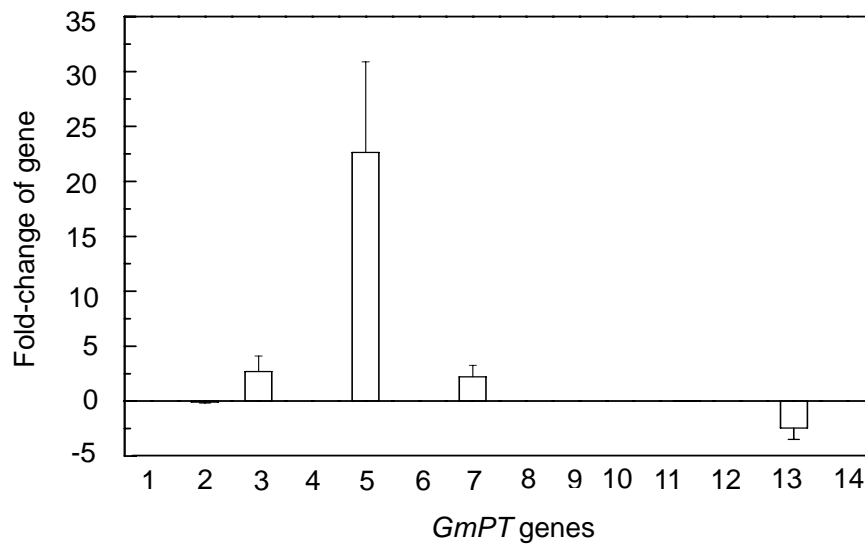

**Figure S2.** The fold-changes of the expressions of *GmPT* genes between low P and high P supplies in soybean nodules. Total RNA was extracted from the soybean nodules at 30 days after inoculation with rhizobial strain BXYD3 in nutrient solution with 5 $\mu$ M P (low P) or 250 $\mu$ M P (high P) supply under low N conditions. The fold-change was calculated by the relative expression value of the corresponding *GmPT* at low P divided by that at high P in nodules. The negative value represented that the expression value of the corresponding *GmPT* was higher at high P than that at low P. There were four biological replicates for each treatment and bars showed mean and standard errors.
