# Supplementary material
Source: PubMed Central journal article supplement (PMC3425202)
Supplement: supp_pp.112.199786_199786Figure_S3.pdf [file supp_pp.112.199786_199786Figure_S3.pdf]

**Figure S3.**

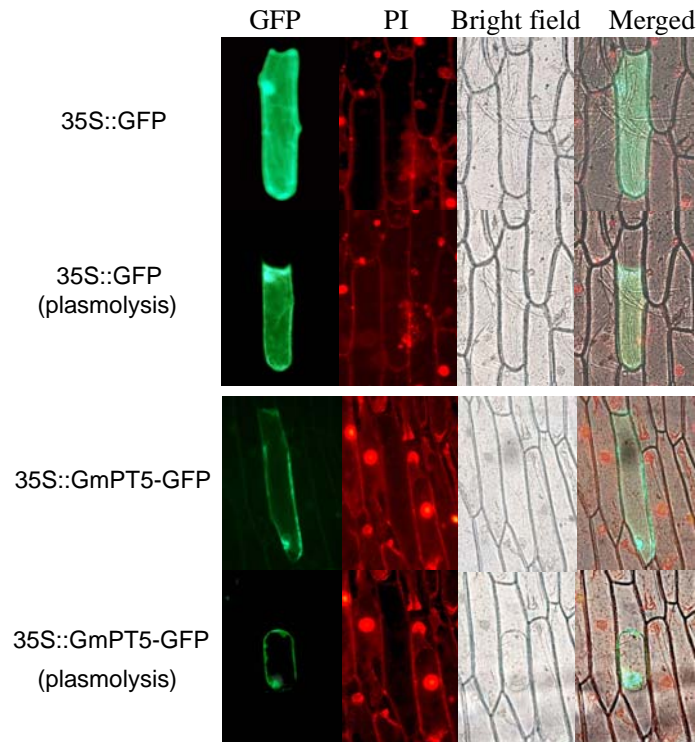

**Figure S3.** Subcellular localization of GmPT5 fused to GFP in epidermal onion cells. The cells were plasmolyzed by adding 30% sucrose solution while confocal scanning. Cells were observed by green fluorescence of GFP protein and red propidium iodide (PI) fluorescence of the cell wall.
