# Supplementary material
Source: PubMed Central journal article supplement (PMC3425202)
Supplement: supp_pp.112.199786_199786Figure_S4.pdf [file supp_pp.112.199786_199786Figure_S4.pdf]

**Figure S4.**

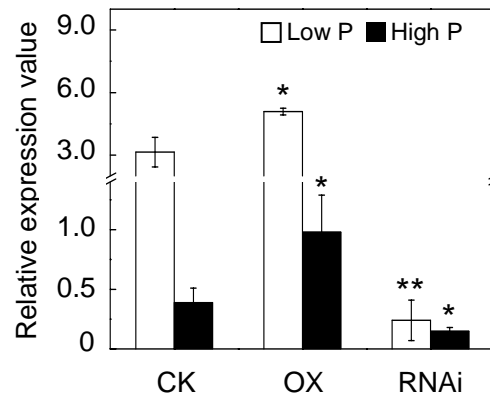

**Figure S4.** Relative expression of *GmPT5* in empty vector (CK), *GmPT5* over-expression (OX) and *GmPT5* knockdown (RNAi) soybean transgenic composite plants at low P (5  $\mu$ M P) and high P (250  $\mu$ M P) levels. The relative expression value was calculated by the ratio of the expression value of *GmPT5* to that of soybean housekeeping gene *TefS1* (accession #: X56856). Asterisk indicated significant difference of *GmPT5* expression between OX or RNAi and CK at the same P level. \*:  $P < 0.05$ ; \*\*:  $0.001 < P < 0.01$ .
