# Supplementary material
Source: PubMed Central journal article supplement (PMC3425202)
Supplement: supp_pp.112.199786_199786Figure_S5.pdf [file supp_pp.112.199786_199786Figure_S5.pdf]

**Figure S5.**

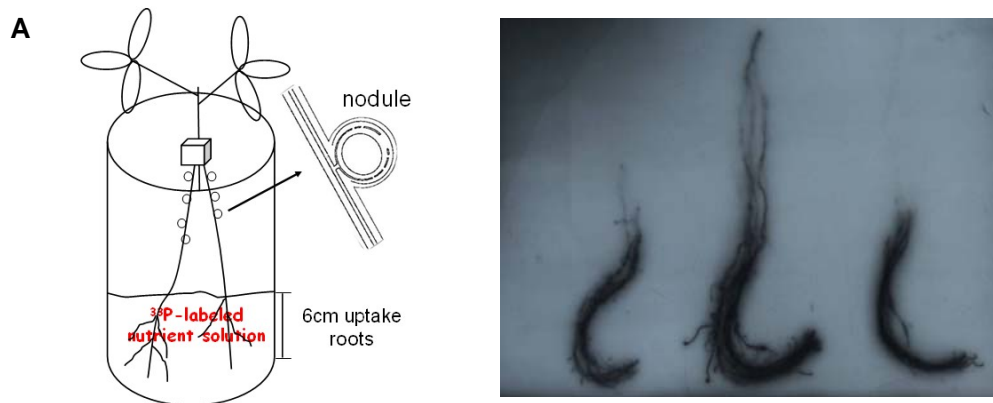

**Figure S5.** *In situ* assays for [<sup>33</sup>P] Pi uptake using transgenic composite soybean plants. A, Graphical representation of the soybean roots treated in the [<sup>33</sup>P] Pi solution. The bottom 6 cm of root regions were directly immersed in the <sup>33</sup>P labeled nutrient solution. Arrows indicated that the nodules in the upper roots were not exposed to the <sup>33</sup>P labeled nutrient solution. B, Autoradiograph of [<sup>33</sup>P] Pi taken up by the bottom 6cm root regions.
