# Supplementary material
Source: PubMed Central journal article supplement (PMC3425202)
Supplement: supp_pp.112.199786_199786Figure_S6.pdf [file supp_pp.112.199786_199786Figure_S6.pdf]

**Figure S6.**

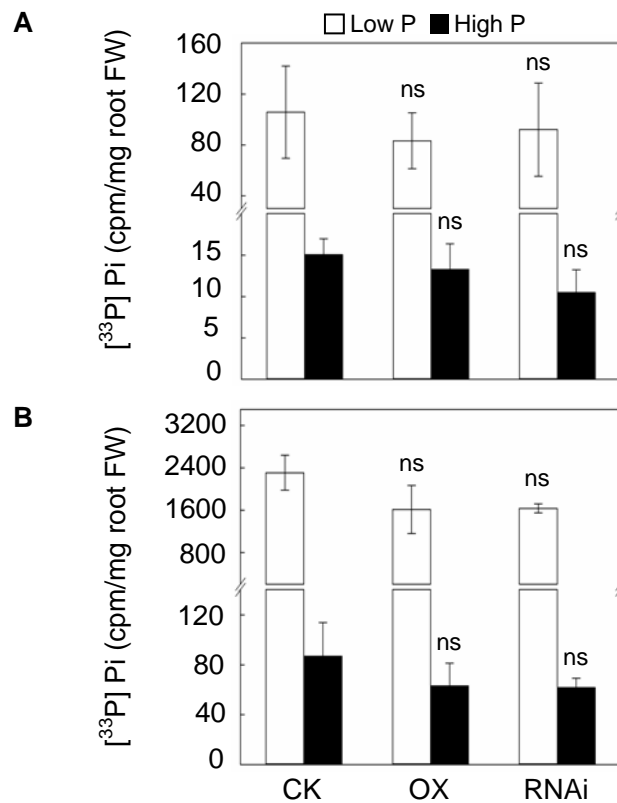

**Figure S6.** *In situ* assays for  $[^{33}\text{P}] \text{Pi}$  taken up by *GmPT5* transgenic composite soybean roots. A,  $[^{33}\text{P}] \text{Pi}$  accumulation in the upper root regions which were not exposed to the  $^{33}\text{P}$  labeled nutrient solution. B,  $[^{33}\text{P}] \text{Pi}$  accumulation in the bottom 6 cm of root regions which were directly immersed in the  $^{33}\text{P}$  labeled nutrient solution for an 8 h uptake period. cpm represented radioactive counts per minute measured by a liquid scintillation analyzer. CK, the soybean transgenic composite plants carrying empty vector; OX, the *GmPT5* overexpressing composite plants; RNAi, the *GmPT5* knockdown composite plants. There were four biological replicates for each treatment, and bars showed means and standard errors. Asterisk indicated significant difference between OX or RNAi and CK at the same P level through *t*-test. ns: not significant at 0.05.
